# Supplementary material
Source: PubMed Central journal article supplement (PMC2772108)

# Revisiting the Sponge Sources, Stereostructure, and Biological Activity of Cyclocinamide A

*Brent K. Rubio,<sup>†</sup> Sarah J. Robinson,<sup>†</sup> Claudia E. Avalos,<sup>†</sup> Frederick A. Valeriote,<sup>‡</sup> Nicole  
J. de Voogd,<sup>§</sup> Phillip Crews<sup>†,\*</sup>*

*Department of Chemistry and Biochemistry and Institute for Marine Sciences, University of California  
Santa Cruz, Santa Cruz, California 95064, Josephine Ford Cancer Center, Henry Ford Health System,  
Detroit, Michigan 48202, and Naturalis, The National Museum of Natural History, P.O. Box 9517, 2300  
RA Leiden, The Netherlands*

## **[Contents]**

**Figure S1.** Isolation Scheme for 07208

**Figure S2.** Photographs of 07202 and 07208

**Figure S1.** Isolation Scheme for 07208

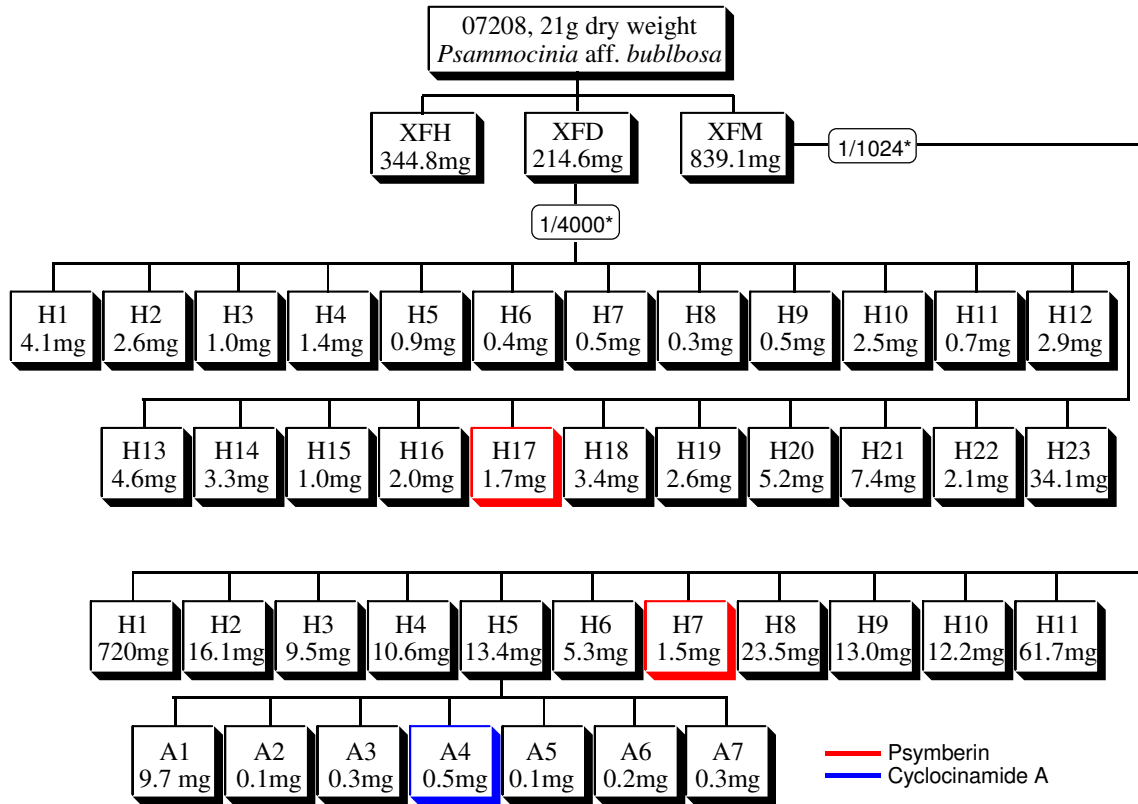

\*Dilution needed for 500 zone units on Disk Diffusion Assay

**Figure S2.** Photographs of 07202 and 07208

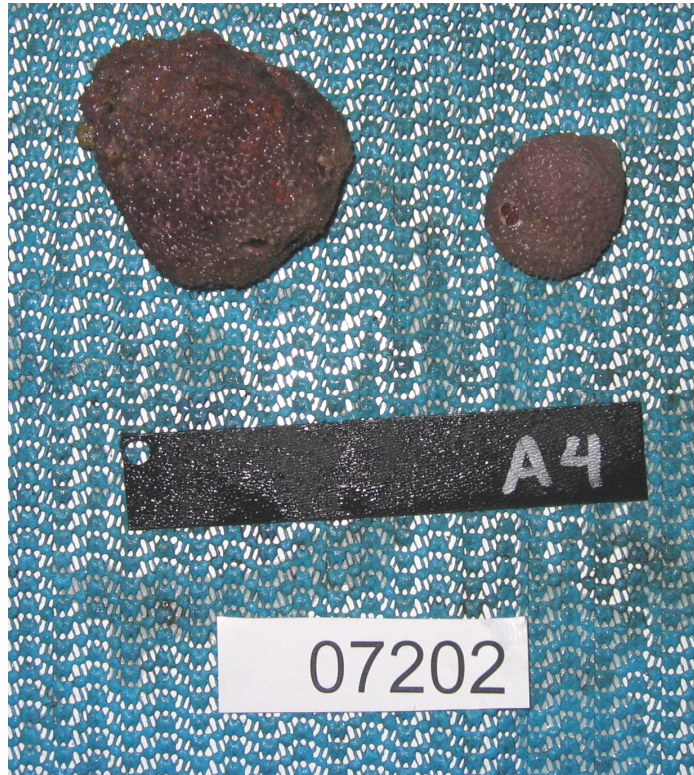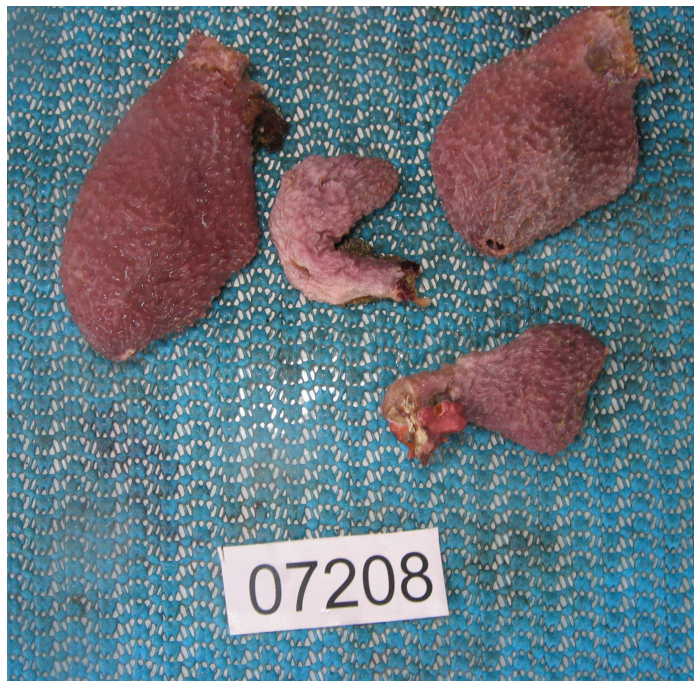

Supplement: NIHMS153446-supplement-Arrays.pdf [file NIHMS153446-supplement-Arrays.pdf]
